# Supplementary material for: Δ133p53β isoform pro-invasive activity is regulated through an aggregation-dependent mechanism in cancer cells
Source: PubMed Central journal article supplement (PMC8443592; doi:10.1038/s41467-021-25550-2), 2021-09-15
Supplement: 41467_2021_25550_MOESM1_ESM.pdf [file 41467_2021_25550_MOESM1_ESM.pdf]

## Supplementary Information

### **$\Delta$ 133p53 $\beta$ isoform pro-invasive activity is regulated through an aggregation-dependent mechanism in cancer cells.**

Nikola Arsic<sup>1,2</sup>, Tania Slatter<sup>3</sup>, Gilles Gadea<sup>4</sup>, Etienne Villain<sup>1,2</sup>, Aurelie Fournet<sup>5,2</sup>, Marina Kazantseva<sup>3</sup>, Frédéric Allemand<sup>5,2</sup>, Nathalie Sibille<sup>5,2</sup>, Martial Seveno<sup>6,2</sup>, Sylvain de Rossi<sup>7</sup>, Sunali Mehta<sup>3</sup>, Serge Urbach<sup>8,2</sup>, Jean-Christophe Bourdon<sup>9</sup>, Pau Bernado<sup>5,2</sup>, Andrey V Kajava<sup>1,2,10</sup>, Antony Braithwaite<sup>3</sup> and Pierre Roux<sup>1,2</sup>

1. Université de Montpellier, Centre de Recherche en Biologie Cellulaire de Montpellier (CRBM), CNRS, UMR 5237, Montpellier, France
2. Université de Montpellier, Montpellier, France
3. Department of Pathology, University of Otago, Dunedin, New Zealand
4. Université de la Réunion, Unité Mixte 134 Processus Infectieux en Milieu Insulaire Tropical, INSERM Unité 1187, CNRS Unité Mixte de Recherche 9192, IRD Unité Mixte de Recherche 249. Plateforme Technologique CYROI, Sainte Clotilde, France.
5. Centre de Biochimie Structurale (CBS), INSERM, CNRS, 29 rue de Navacelles, Montpellier, France
6. BioCampus Montpellier, CNRS, INSERM, Montpellier, France.
7. MRI, UMS BioCampus Montpellier, CNRS, INSERM, Université de Montpellier, Montpellier, France.
8. IGF, CNRS, INSERM, Montpellier, France.
9. Dundee Cancer Centre, University of Dundee, Ninewells Hospital and Medical School, Dundee, United Kingdom.
10. Institut de Biologie Computationnelle, Montpellier, France

To whom correspondence should be addressed: pierre.roux@crbm.cnrs.fr

a

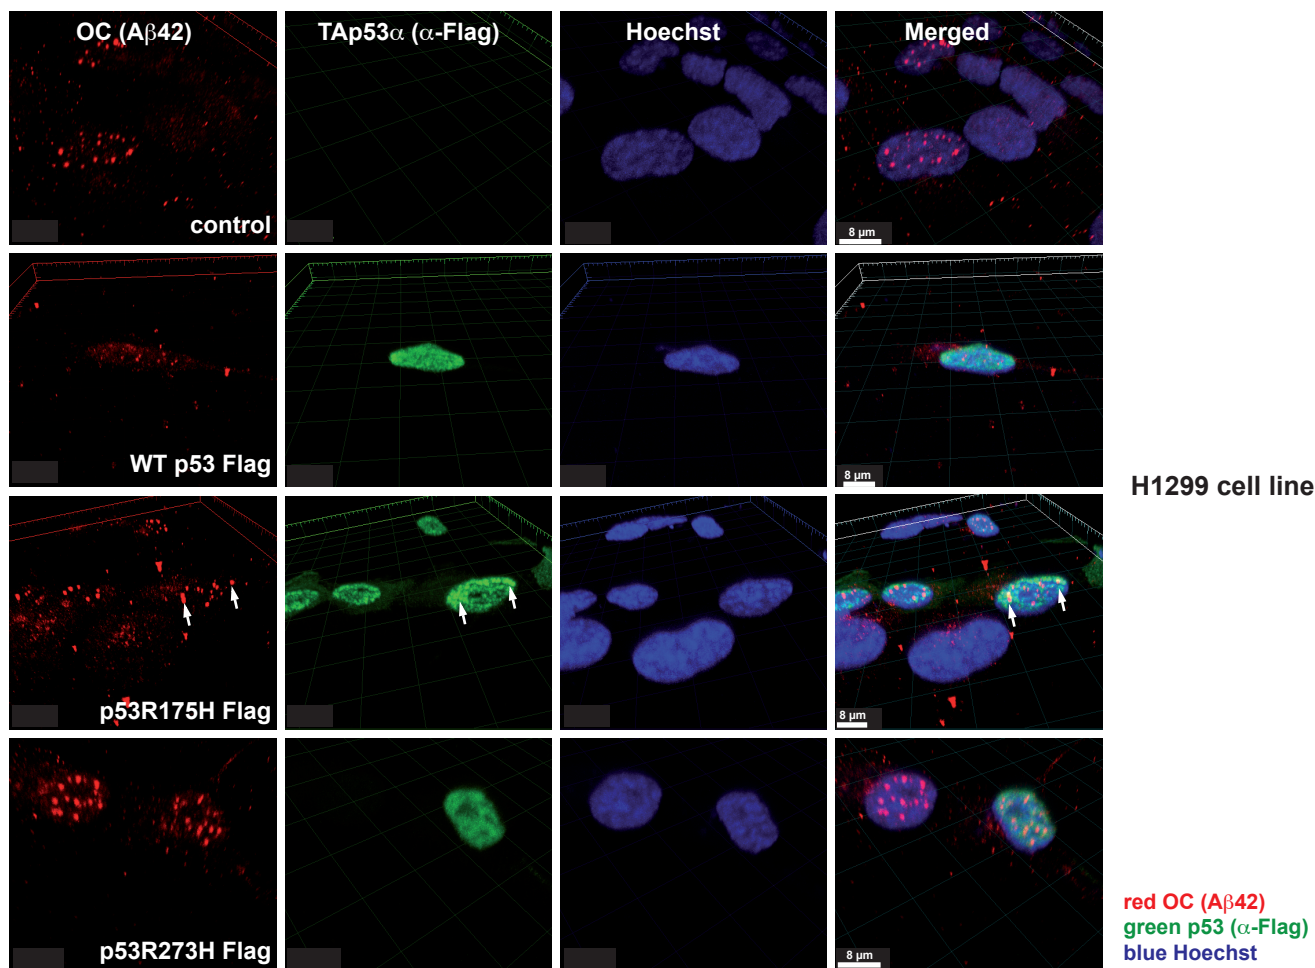

H1299 cell line

b

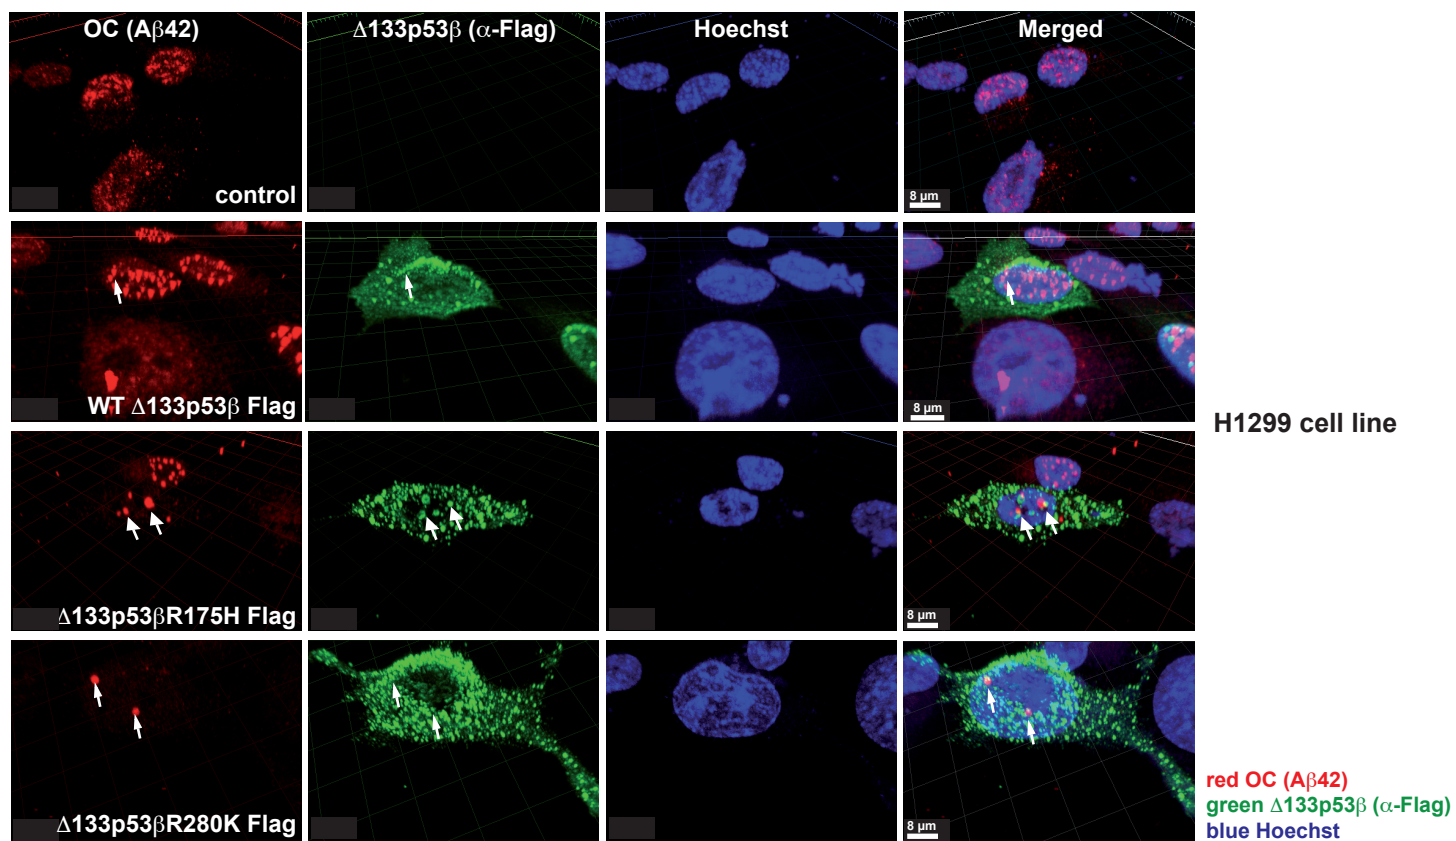

H1299 cell line



**C**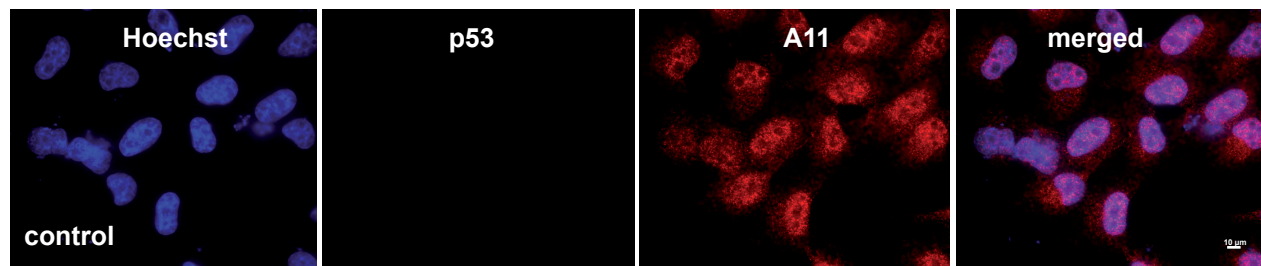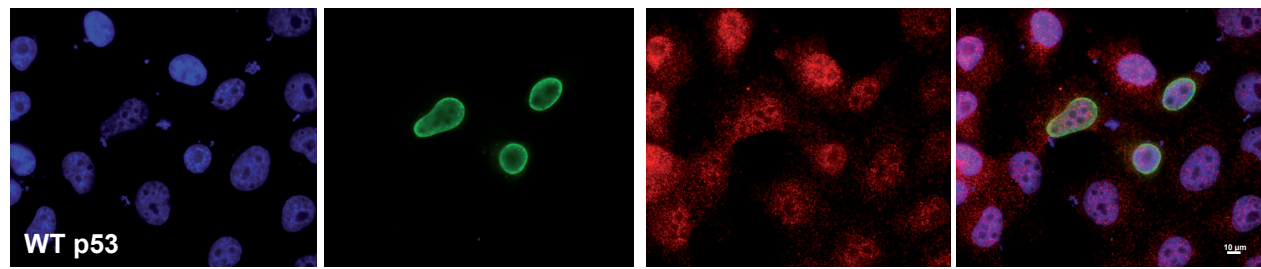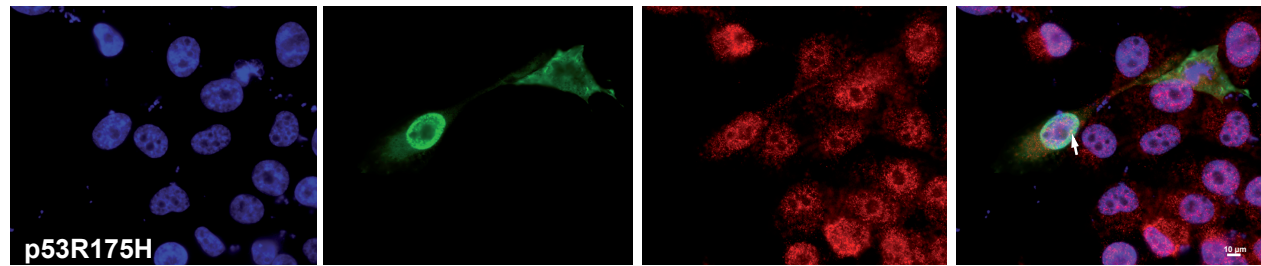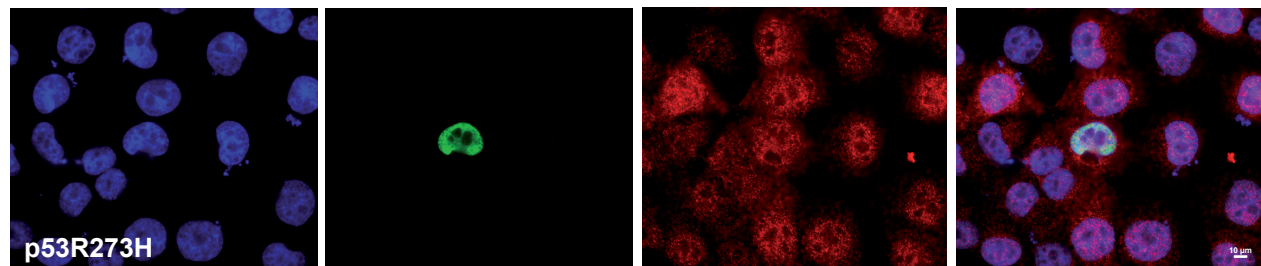**Supplementary Figure 1****H1299 cell line**

green p53 ( $\alpha$ -Flag)  
 red oligomers (A11)  
 blue Hoechst

**d**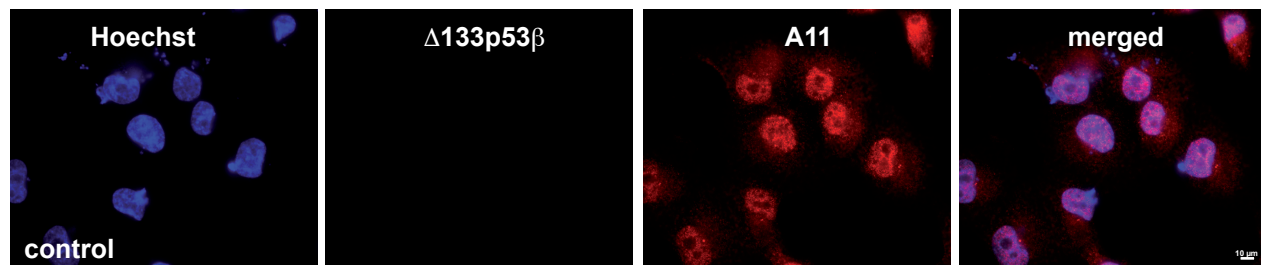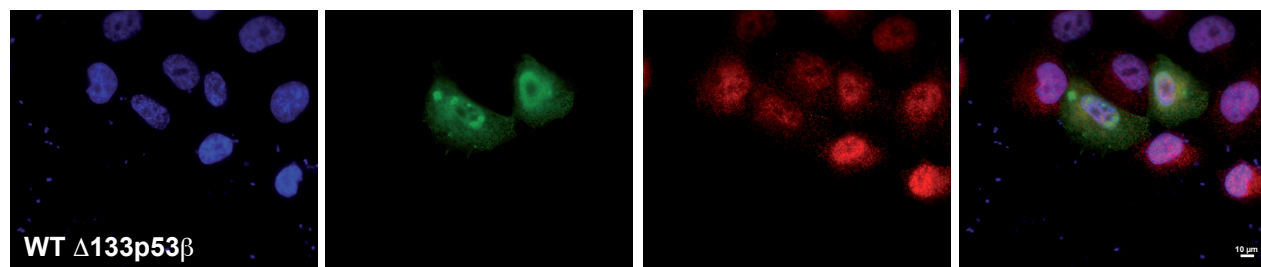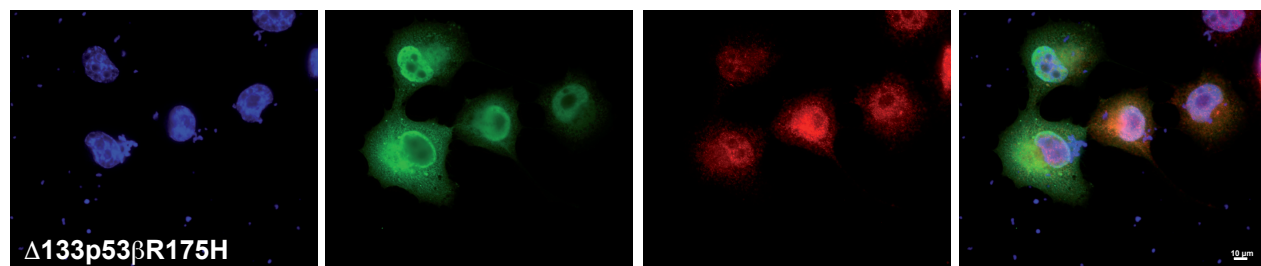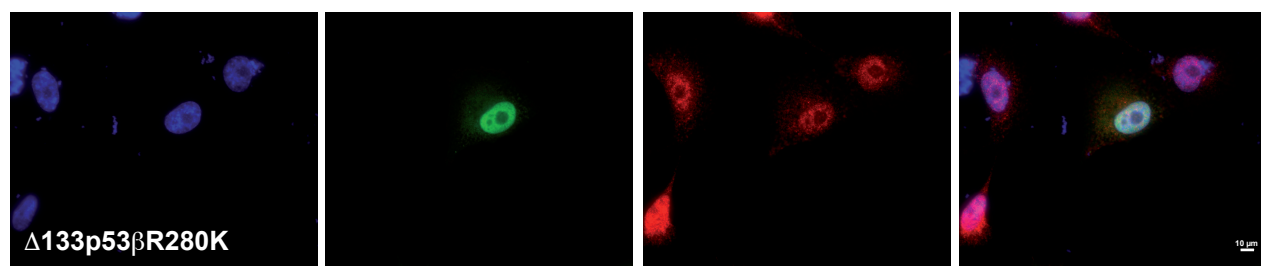**H1299 cell line**

green  $\Delta$ 133p53 $\beta$  ( $\alpha$ -Flag)  
 red oligomers (A11)  
 blue Hoechst

**Supplementary Figure 1. Immunofluorescent analysis p53 isoforms co-localisation with amyloid aggregates and protein oligomers.**

**a.** 3D reconstruction of confocal immunofluorescent Z-stack images of H1299 cells transfected with WT, structurally and contact mutated p53 with separated acquisition channels. Green:  $\alpha$ -Flag (p53), red:  $\alpha$ -OC (A $\beta$ 42, amyloid aggregates) antibody, blue: Hoechst. Scale bar 8 $\mu$ m. n=3

**b.** 3D reconstruction of the confocal immunofluorescent Z-stack images of H1299 cells transfected with WT, structurally and contact mutated  $\Delta$ 133p53 $\beta$  with separated acquisition channels. Green:  $\alpha$ -Flag ( $\Delta$ 133p53 $\beta$ ), red:  $\alpha$ -OC (A $\beta$ 42, amyloid aggregates) antibody, blue: Hoechst. Scale bar 8 $\mu$ m. n=3

**c.** Immunofluorescent analysis wt, structural and contact mutant of p53 co-localisation with protein oligomers visualised by A11 antibody. Green: Flag (p53), Red: protein oligomers (A11 antibody), Blue: Hoechst. n=3

**d.** Immunofluorescent analysis wt, structural and contact mutant of  $\Delta$  133p53 $\beta$  co-localisation with protein oligomers visualised by A11 antibody. Green: Flag ( $\Delta$ 133p53 $\beta$ ), Red: protein oligomers (A11 antibody), Blue: Hoechst. n=3

The arrows indicate co-localisation.

Scale bar 10 $\mu$ m.

Source data are provided as a Source Data file.

a

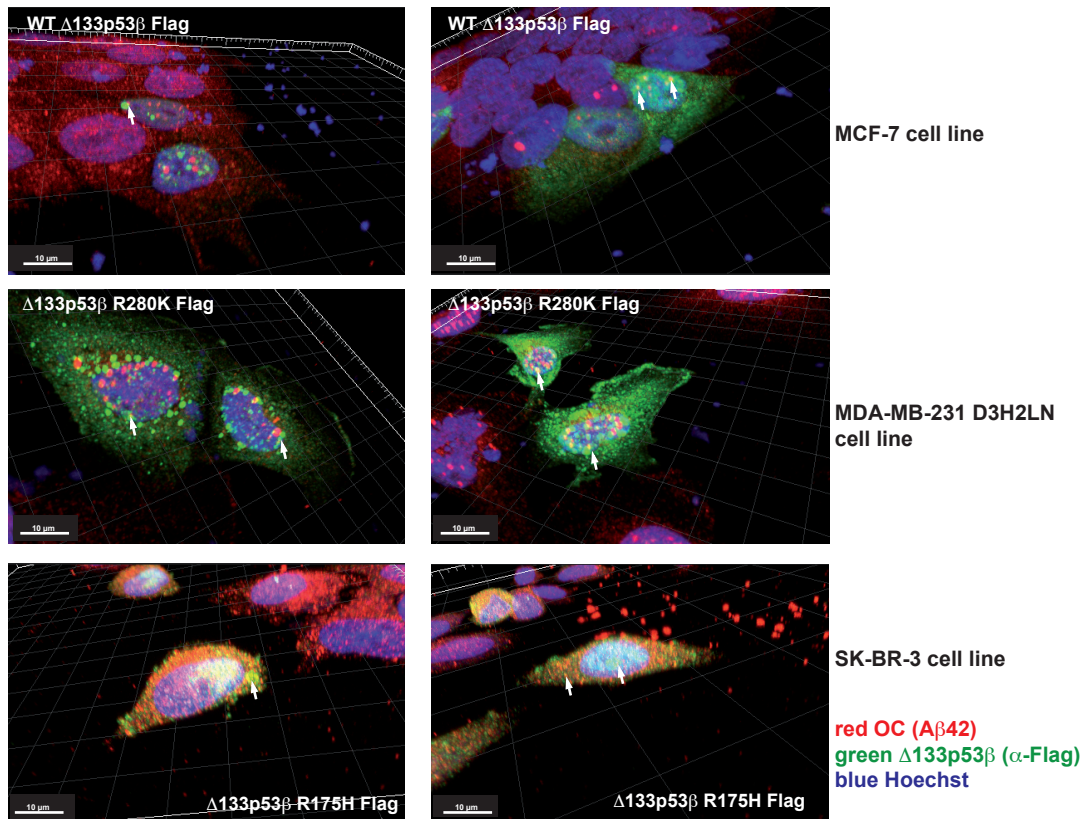

b

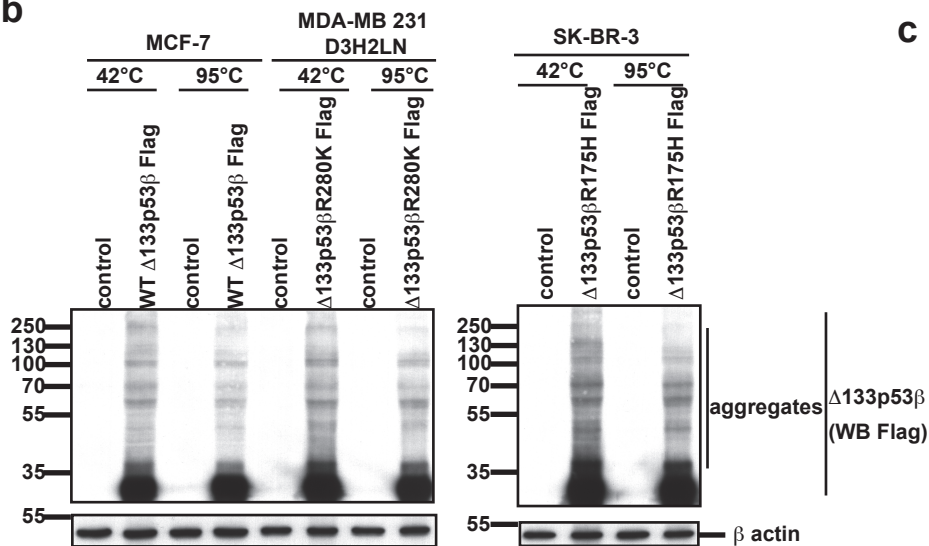

c

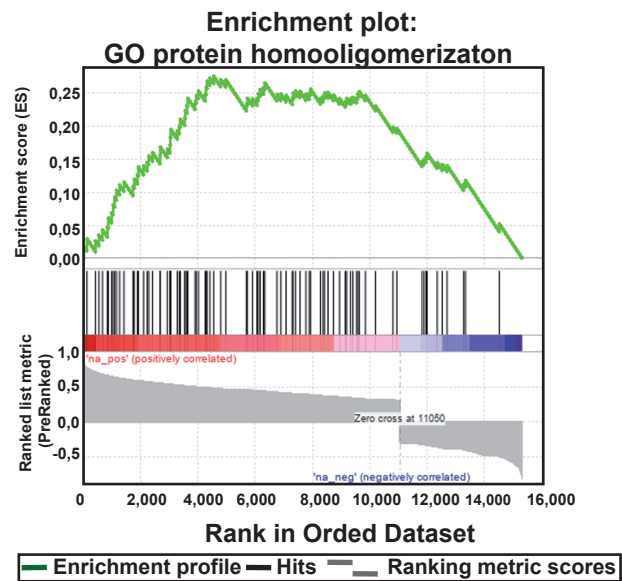

d

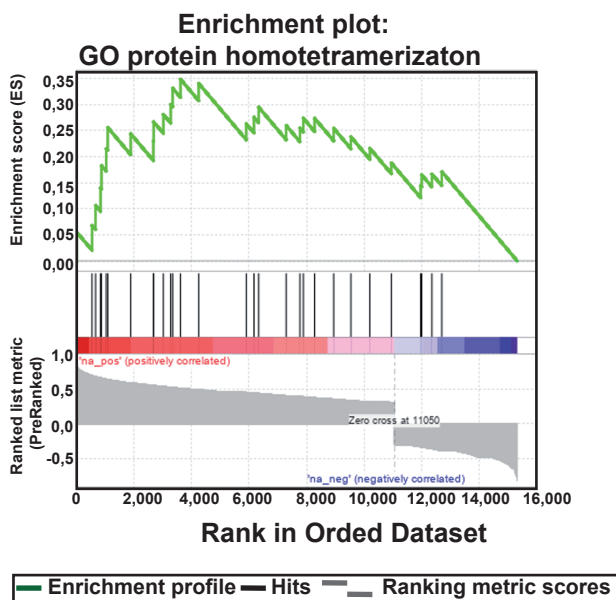

e

| Homo tetramerization | $\Delta 133p53\beta$ correlation |
|----------------------|----------------------------------|
| <i>KCNJ12</i>        | 0.522                            |
| <i>RNF135</i>        | 0.511                            |
| <i>KCTD5</i>         | 0.483                            |
| <i>FUS</i>           | 0.476                            |
| <i>TRPM2</i>         | 0.448                            |
| <i>CRTC2</i>         | 0.399                            |
| <i>KCTD15</i>        | 0.392                            |
| <i>POLQ</i>          | 0.344                            |
| <i>ALDOA</i>         | 0.329                            |
| <i>BLM</i>           | 0.328                            |
| <i>MCOLN1</i>        | 0.308                            |

**Supplementary Figure 2. Evaluation of aggregate forming capacity of  $\Delta 133p53\beta$  isoform in different breast cancer cell lines.**

**a.** Immunofluorescent analysis of  $\Delta 133p53\beta$  co-localisation with amyloid type aggregates in MCF-7, MDA-MB 231 D3H2LN and SK-BR-3 cells upon 3D reconstruction of confocal Z-stacks. Green:  $\alpha$ -Flag ( $\Delta 133p53\beta$ ), Red:  $\alpha$ -OC (A $\beta$ 42, amyloid aggregates), blue: Hoechst. Scale bar 10  $\mu$ m. n=3

**b.** Western blot analysis of  $\Delta 133p53\beta$  aggregation forming capacity in MCF-7, MDA-MB 231 D3H2LN and SK-BR-3 cells from the soluble protein fraction. n=3

**c.** Enrichment plot obtained by Gene Ontology analysis for protein homoligomerisation processes upon RNAseq analysis performed on prostate cancer samples that correlate with  $\Delta 133p53\beta$  expression. n=3

**d.** Enrichment plot obtained by Gene Ontology analysis for protein homotetramerisation processes upon RNAseq analysis performed on prostate cancer samples that correlate with  $\Delta 133p53\beta$  expression.

**e.** Examples of genes involved in cellular processes linked to tetramerization obtained by Gene Ontology analysis for protein homotetramerisation processes upon RNAseq analysis performed on prostate cancer samples that correlate with  $\Delta 133p53\beta$  expression.

The arrows indicate co-localisation.

Molecular weight is expressed in kDa.

Source data are provided as a Source Data file.



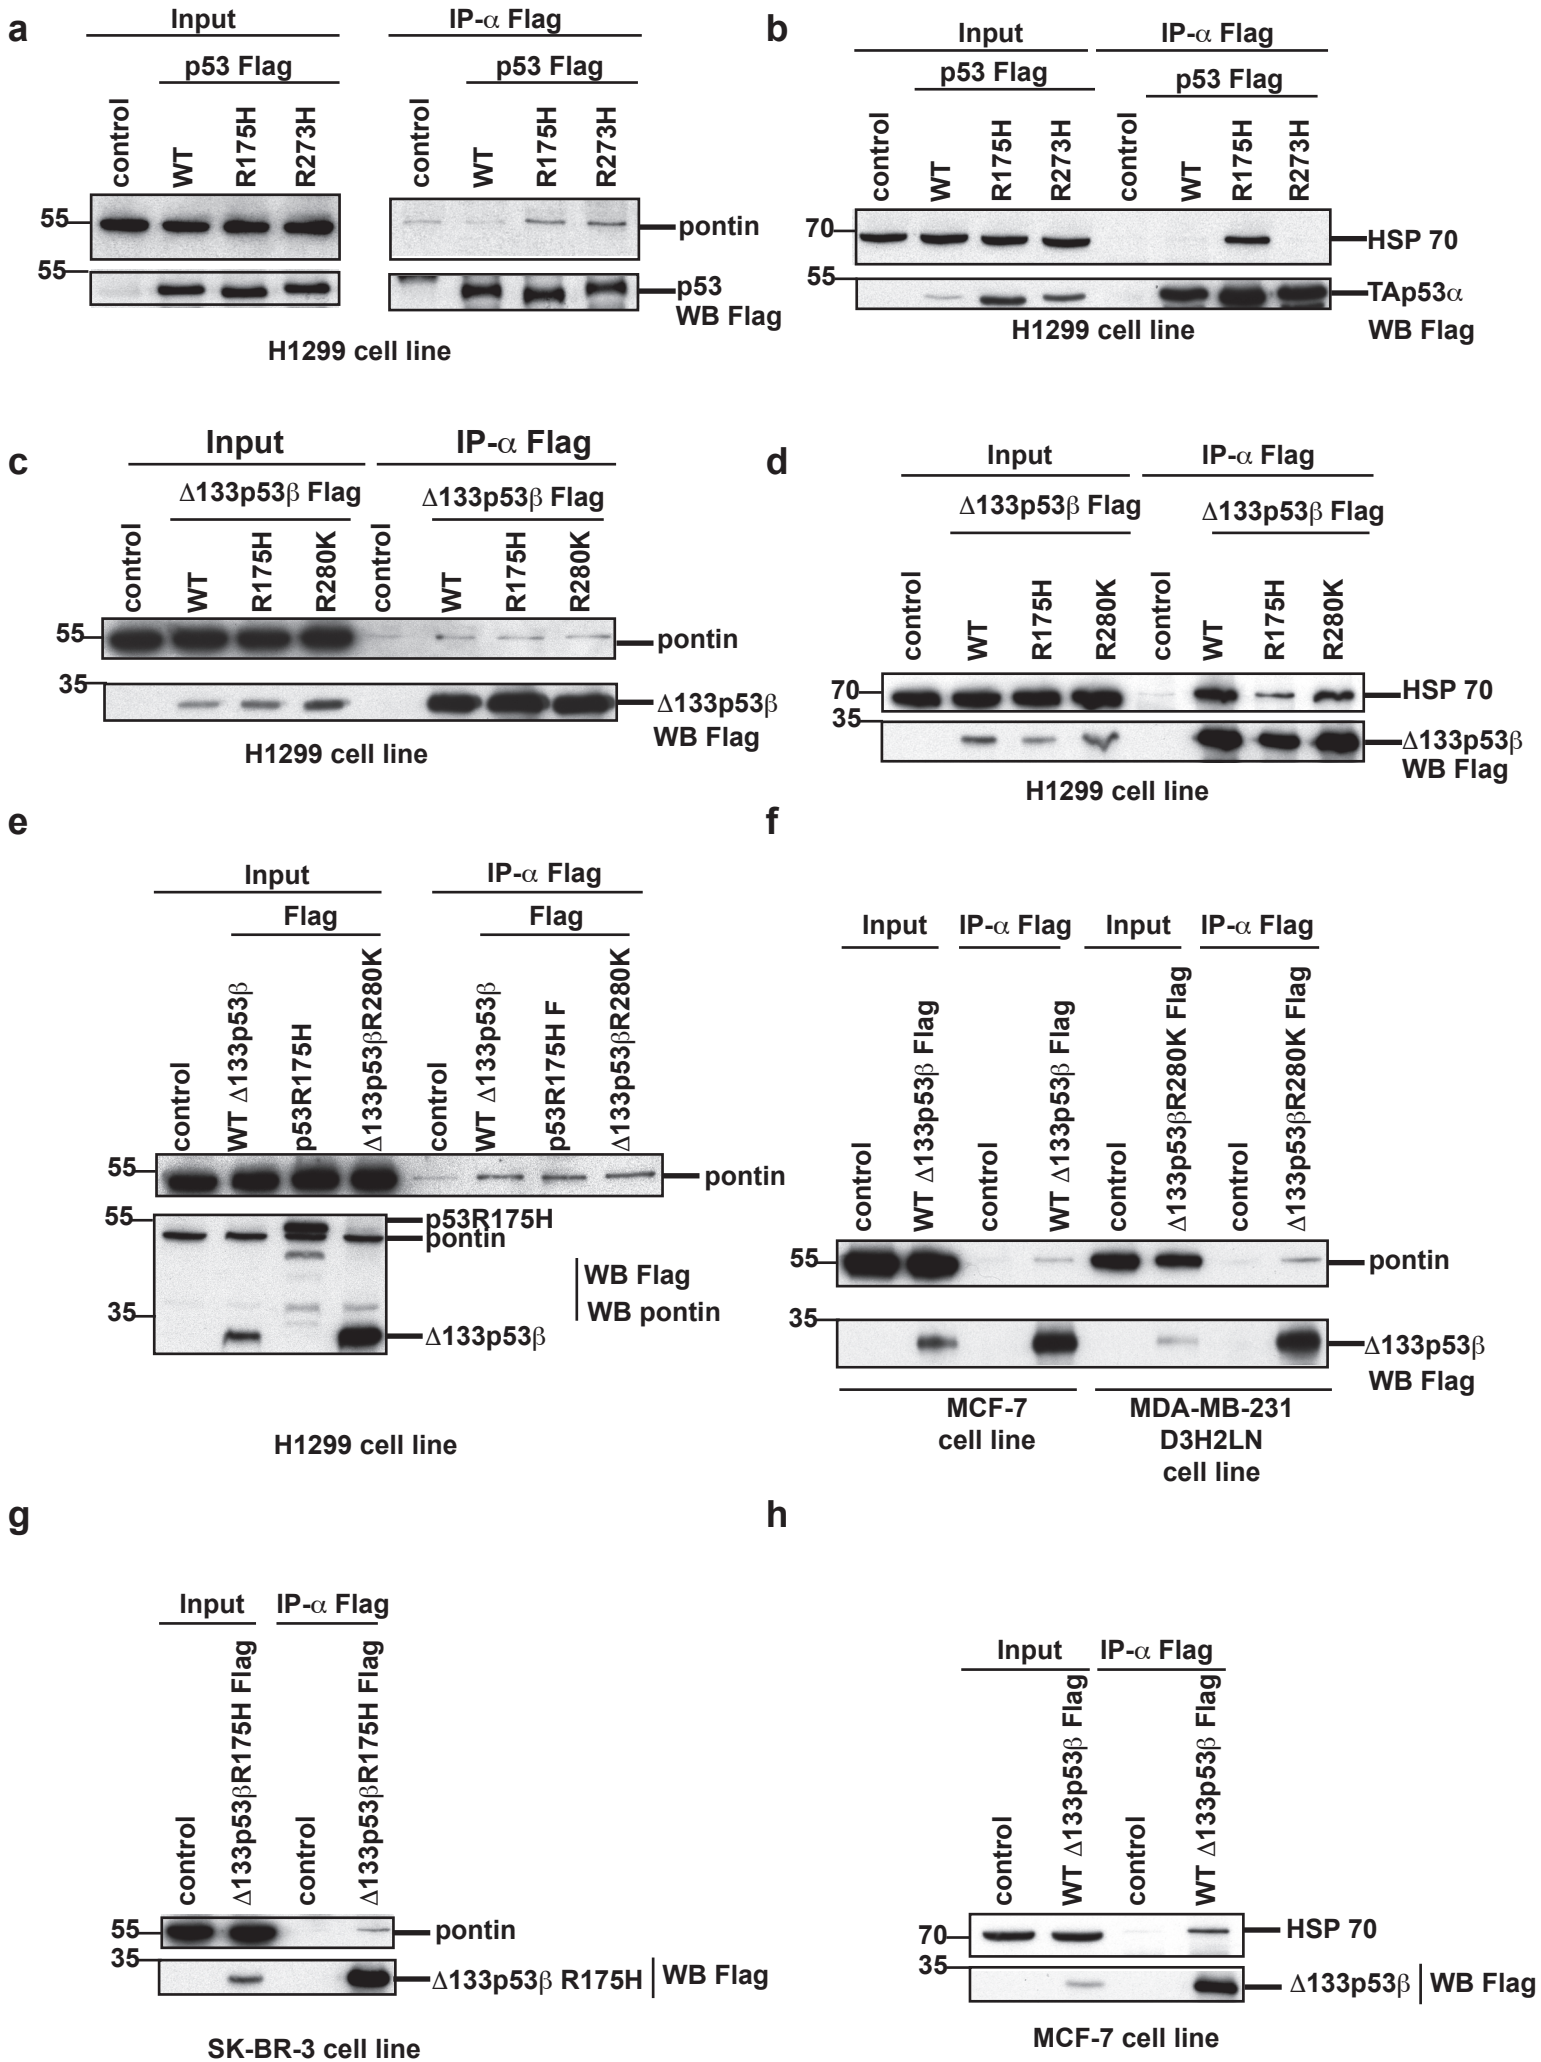

i

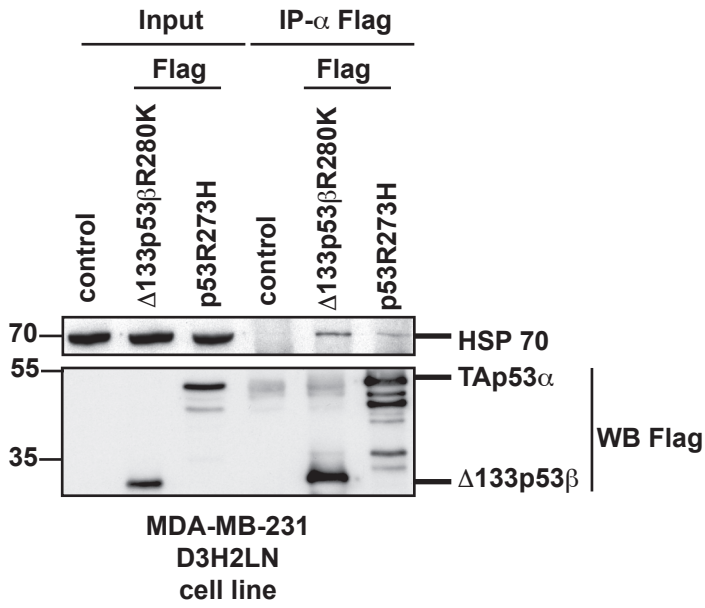

j

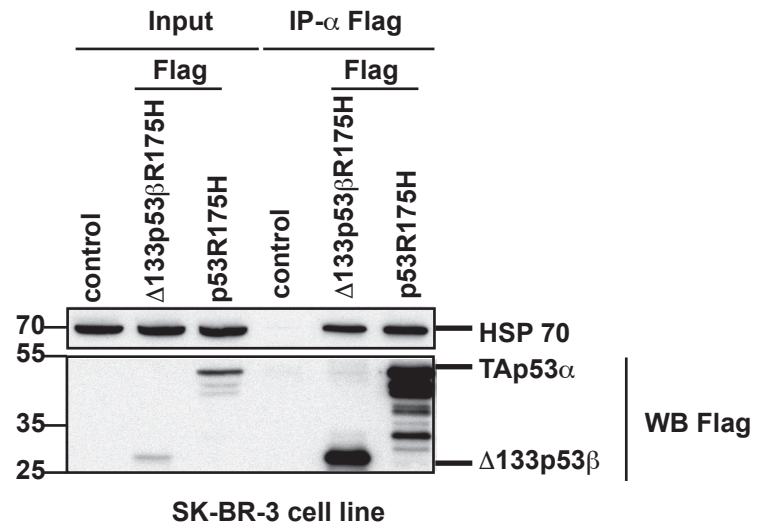

k

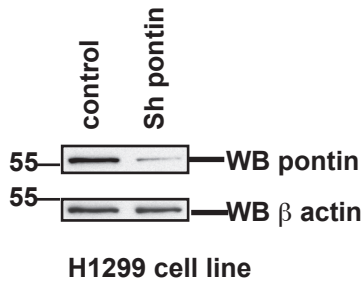

l

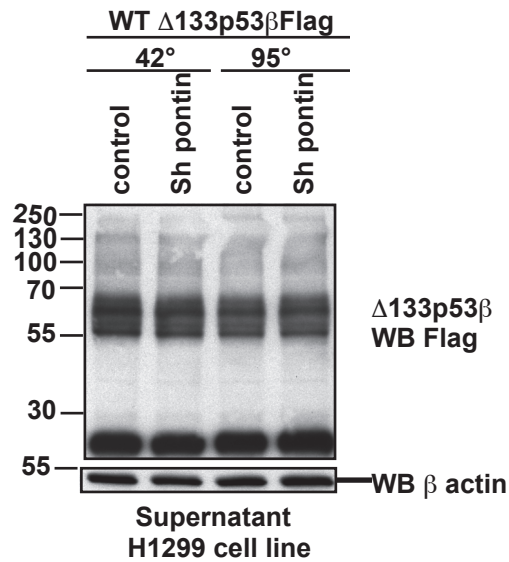

m

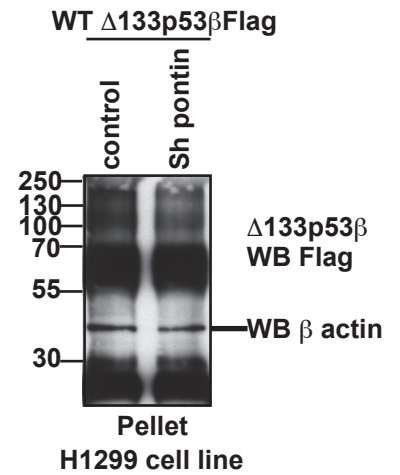

n

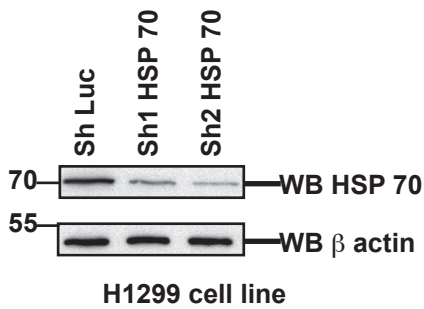

o

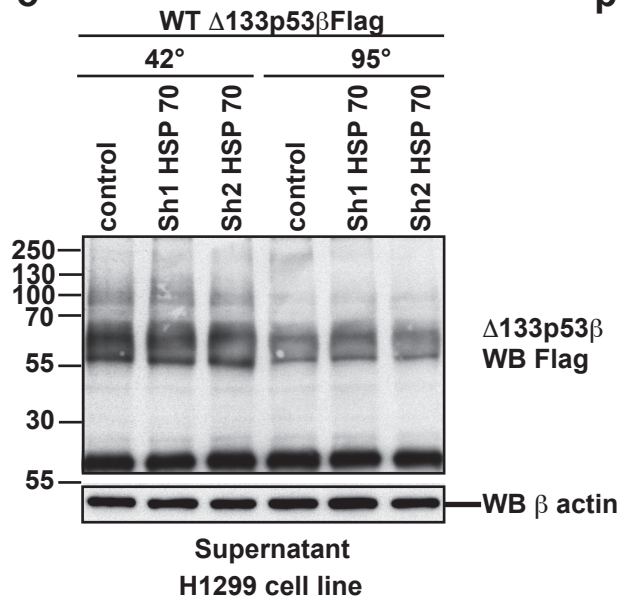

p

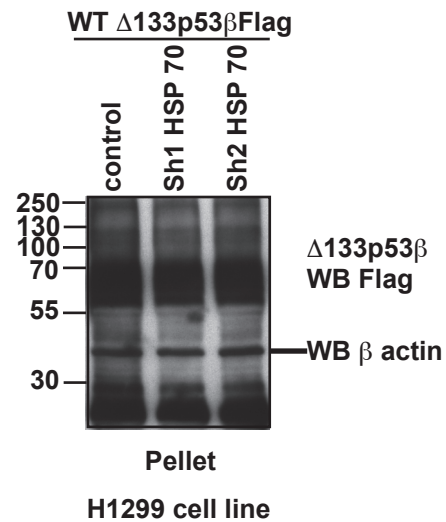

**Supplementary Figure 3. Evaluation of the Pontin and HSP70 effects on  $\Delta 133p53\beta$  aggregation capacity.**

- a.** Co-immunoprecipitation analysis of WT p53, structurally and contact mutated proteins association with Pontin in H1299 cell line. n=3
- b.** Co-immunoprecipitation analysis of WT p53, structurally and contact mutated proteins association with HSP70 in H1299 cell line. n=5
- c.** Co-immunoprecipitation analysis of WT  $\Delta 133p53\beta$ , structurally and contact mutated proteins association with Pontin in H1299 cell line. n=3
- d.** Co-immunoprecipitation analysis of WT  $\Delta 133p53\beta$ , structurally and contact mutated proteins association with HSP70 in H1299 cell line. n=5
- e.** Co-immunoprecipitation analysis of Pontin interaction with different p53 isoforms upon expression in H1299 cells. n=3
- f and g.** Co-immunoprecipitation analysis of Pontin interaction with  $\Delta 133p53\beta$  isoform in MCF-7, MDA-MB 231 D3H2LN and SK-BR-3 cells. n=3
- h-j.** Co-immunoprecipitation analysis of HSP70 interaction with  $\Delta 133p53\beta$  isoform in MCF-7, MDA-MB 231 D3H2LN and SK-BR-3 cells. n=5
- k.** Western blot analysis of Pontin depletion upon Sh RNA application in H1299 cell line. n=2
- l.** Western blot analysis of the soluble protein fraction from H1299 cells after  $\Delta 133p53\beta$  transfection in control and Pontin depleted backgrounds. n=2
- m.** Western blot analysis of the insoluble protein fraction from H1299 cells after WT  $\Delta 133p53\beta$  transfection in control and Pontin depleted backgrounds. n=2
- n.** Western blot analysis of HSP70 depletion upon two different Sh RNA applications in H1299 cell line. n=3
- o.** Western blot analysis of the soluble protein fraction from H1299 cells after  $\Delta 133p53\beta$  transfection in control and HSP70 depleted backgrounds. n=3
- p.** Western blot analysis of the insoluble protein fraction from H1299 cells after WT  $\Delta 133p53\beta$  transfection in control and HSP70 depleted backgrounds. n=3

Molecular weight is expressed in kDa.

Source data are provided as a Source Data file.

**a**

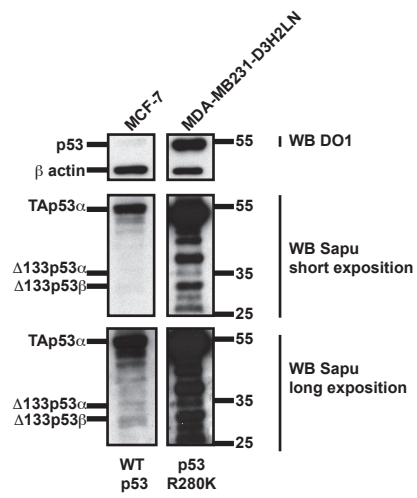

**b**

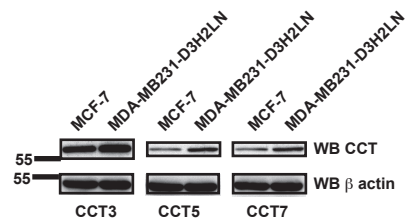



**Supplementary Figure 4. p53 isoform and CCT complex abundance in MCF-7 and MDA-MB-231 D3H2LN.**

**a.** Western blot analysis of p53 isoform abundance in MCF-7 and MDA-MB-231 D3H2LN cell lines. n=3

**b.** Western blot analysis of CCT complex subunit abundance in MCF-7 and MDA-MB-231 D3H2LN cell lines. n=3

Molecular weight is expressed in kDa.

Source data are provided as a Source Data file.

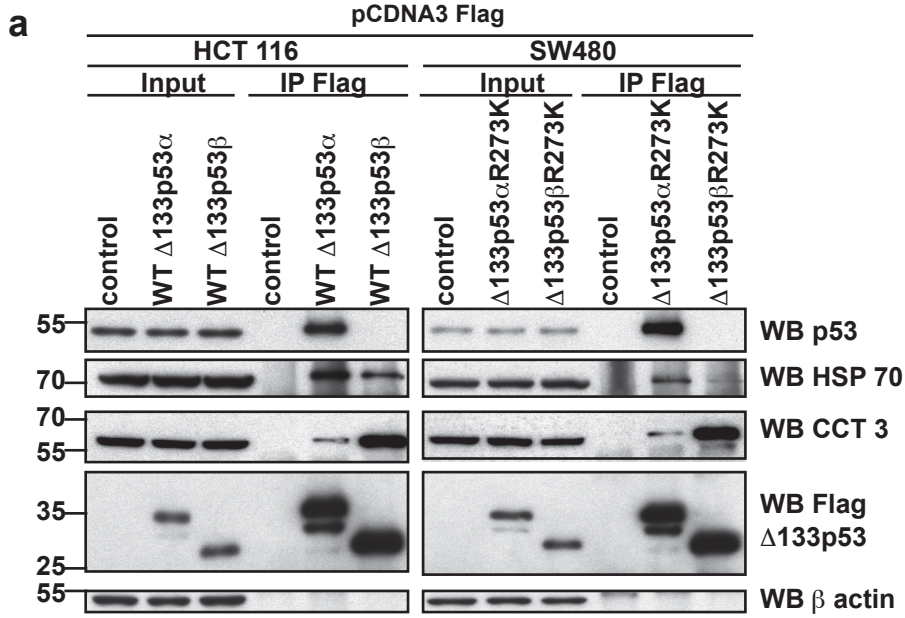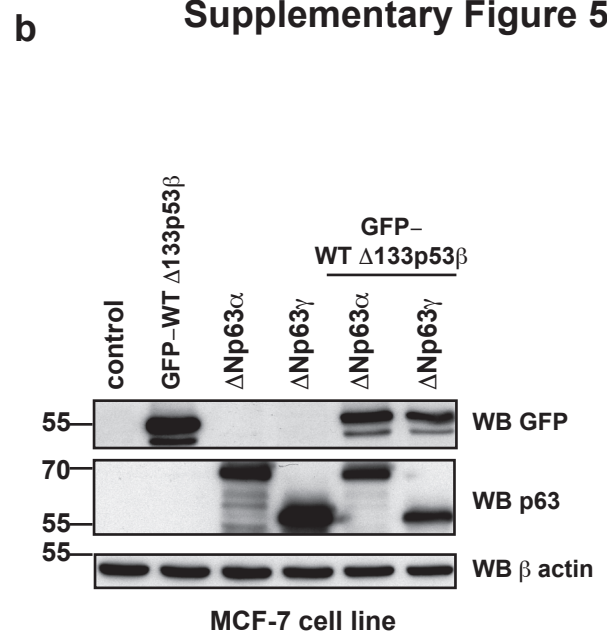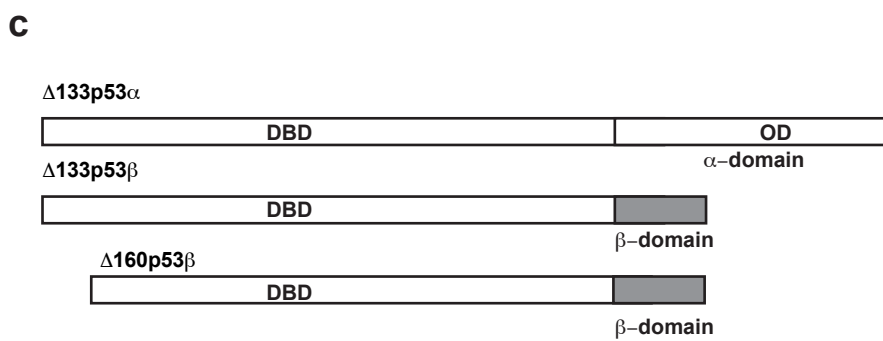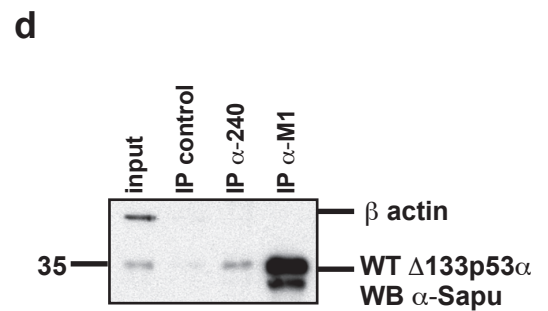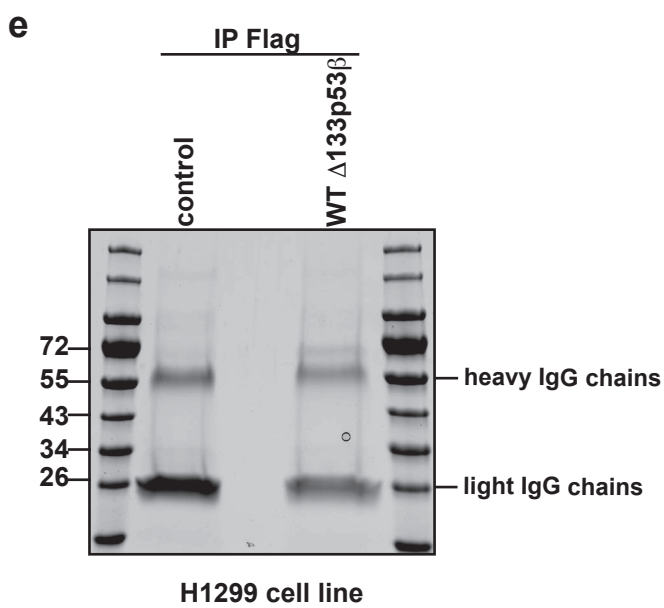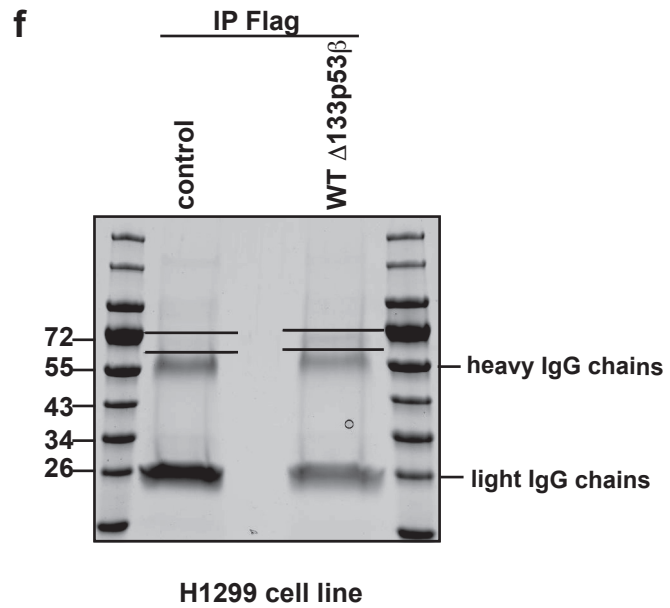

**Supplementary Figure 5. Co-immunoprecipitation and expression analysis of WT  $\Delta 133p53\beta$  interactions in different cellular backgrounds.**

**a.** Co-immunoprecipitation analysis of WT  $\Delta 133p53\alpha$  and WT  $\Delta 133p53\beta$  interactions with different partners upon expression in HCT116 and SW480 colon cancer cell lines.

n=3-5 for different panels of the figure

**b.** Western blot analysis of expression and co-expression of EGFP tagged WT  $\Delta 133p53\beta$  and  $\Delta Np63\alpha$  and  $\Delta Np63\gamma$  isoforms used for time-lapse imaging (Supplementary Movies 4-9).

Representative immunoblot of one out of 3 experiments is shown.

**c.** Schematic representation of  $\Delta 133p53\alpha$ ,  $\beta$  and  $\Delta 160p53\beta$  isoforms.

**d.** Immunoprecipitation analysis of WT  $\Delta 133p53\alpha$  isoform by Ab 240 and CM1 in H1299 cell line. n=2

**e.** Silver stained polyacrylamide gel upon electrophoretic separation of immunoprecipitation reaction with  $\alpha$ -Flag beads performed on control and  $\Delta 133p53\beta$  transfected H1299 cells. In total 3 different proteomic analyses were performed. The most pertinent is shown.

**f.** Delineated regions of the silver stained polyacrylamide gel upon electrophoretic separation of immunoprecipitation reaction with  $\alpha$ -Flag beads performed on control and  $\Delta 133p53\beta$  transfected H1299 cells that were dissected and used for proteomic analysis.

In total 3 different proteomic analyses were performed. The most pertinent is shown.

Molecular weight is expressed in kDa.

| <b>Tissue type</b>              |                  |                 | <b>n</b> | <b>% of samples with aggregates</b> | <b>% of cells with aggregates</b> |
|---------------------------------|------------------|-----------------|----------|-------------------------------------|-----------------------------------|
| <b>Breast tumour</b>            | Brain metastasis | Triple negative | 5        | 100%                                | 11, 30, 55, 70, and 77%           |
|                                 | Brain metastasis | Her2 positive   | 5        | 80% (n=4)                           | 12, 15*, 19 and 25%               |
|                                 | Primary          | Triple negative | 5        | 60% (n=3)                           | 18, 27*, and 30%*                 |
|                                 | Primary          | Her2 positive   | 5        | 40% (n=2)                           | 17* and 26%                       |
|                                 | Primary          | ER+PR+ HER2-    | 5        | 20% (n=1)                           | Scattered positive                |
| <b>Breast normal associated</b> |                  |                 | 15       | 20% (n=3)                           | Scattered positive                |
| <b>Lung tumour</b>              | Brain metastasis | Adenocarcinoma  | 5        | 40% (n=2)                           | 9* and 25%*                       |
|                                 | Primary          | Adenocarcinoma  | 3        | 0%                                  |                                   |
| <b>Lung normal associated</b>   |                  |                 | 3        | 0%                                  |                                   |
| <b>Colorectal tumour</b>        | Brain metastasis | Adenocarcinoma  | 3        | 67% (n=2)                           | 8* and 12%*                       |

\*, aggregates present in parts of the tumour only. In these tumours the percent of cells with aggregates were counted in positive areas

Supplementary Table 1. Quantification of aggregates in human tumour samples



| Target gene       | Sequence                 |
|-------------------|--------------------------|
| Pontin            | GCATGACTTGGATGTGGCTAATGC |
| HSP70             | CGTGGAGGAGTTCAAGAGAA     |
| HSP70             | GCCATGACGAAAGACAACAA     |
| $\Delta$ Np63     | GGACAGCAGCATTGATCAA      |
| TAp63             | TTCCTCAGTCCAGAGGTTT      |
| $\Delta$ 133p53   | GGAGGTGCTTACACATGTT      |
| CCT2              | GCCTCTCTTATGGTAACCAA     |
| CCT3              | GCCAAGTCCATGATCGAAAT     |
| CCT5              | CCACTTCTGTGATTAAGTA      |
| CCT7              | GCCACAATTCTGAACTTCT      |
| Si $\Delta$ 133-1 | GGAGGTGCTTACACATGTT      |
| Si $\Delta$ 133-2 | CTTGTGCCCTGACTTTCAA      |
| Si $\beta$        | GGACCAGACCAGCTTTCA       |

Supplementary Table 2. List of Sh and Si RNA used for gene silencing

| Antibody              | Reference                                                          |
|-----------------------|--------------------------------------------------------------------|
| Flag                  | mouse monoclonal 1804, Sigma                                       |
| p53                   | Ab 240, mouse monoclonal <sup>1</sup>                              |
| p53                   | DO-1, mouse monoclonal sc-126, Santa Cruz Biotechnology            |
| p53                   | Sapu, sheep polyclonal p53 pantropic <sup>2</sup>                  |
| p53                   | CM1, rabbit polyclonal <sup>3</sup>                                |
| p53                   | PAb421 antibody, Millipore Sigma, Burlington, MA, USA),            |
| Pontin                | RUVBL1 rabbit polyclonal ref 102-10-2-AP, Proteintech,             |
| HSP70                 | mouse monoclonal (W27):sc-24 Santa Cruz Biotechnology              |
| CCT2                  | rat monoclonal VMA00026 Bio-Rad                                    |
| CCT3                  | goat polyclonal VPA00113 Bio-Rad                                   |
| CCT5                  | rat monoclonal MCA2178 Bio-Rad                                     |
| CCT7                  | rat monoclonal MCA2179 Bio-Rad                                     |
| GFP                   | rabbit polyclonal anti GFP (Invitrogen, Life Technologies, A-6455) |
| p63                   | rabbit monoclonal Abcam, Ab 124762                                 |
| p63                   | mouse monoclonal Abnova, MAB7941 clone 4A4                         |
| E cadherin            | mouse monoclonal Cat No 131700 Zymed (now Life Technologies)       |
| N cadherin            | mouse monoclonal Cat No. 610921 BD Biosciences                     |
| tubulin               | mouse monoclonal T6199 Sigma                                       |
| $\beta$ actin         | mouse monoclonal A5441 Sigma                                       |
| $\beta$ p53 KJC8      | (Bourdon et al., 2005)                                             |
| Oligomer A11 antibody | Rabbit polyclonal Invitrogen AHB0052                               |
| $\alpha$ -p63         | SFI-6 antibody (DCS Innovative Diagnostik-Systeme Germany)         |

Supplementary Table 3. List of the antibodies used for immunoblot and immunofluorescent analysis

| Antibody                   | dilution |
|----------------------------|----------|
| $\alpha$ -p53 DO-1         | 1:500    |
| $\alpha$ -pontin           | 1:250    |
| $\alpha$ -Flag             | 1:500    |
| $\alpha$ -p53 Sapu,        | 1:6000   |
| $\alpha$ - $\beta$ actin   | 1:10000  |
| $\alpha$ -HSP70            | 1:500    |
| $\alpha$ -CCT2, 3, 5 and 7 | 1:1000   |
| $\alpha$ -p63              | 1:1000   |
| $\alpha$ -E cadherin       | 1:500    |
| $\alpha$ -N cadherin       | 1:500    |
| $\alpha$ -tubulin          | 1:10000  |
| $\alpha$ -GFP              | 1:500    |

Supplementary Table 4. Dilutions of the antibodies used for immunoblots

| Antibody                          | dilution |
|-----------------------------------|----------|
| $\alpha$ -Flag                    | 1:500    |
| $\alpha$ -Amyloid Fibrils OC      | 1:500    |
| Oligomer A11 antibody             | 1:500    |
| $\alpha$ - p63 (Abcam, Ab 124762) | 1:500    |
| KJC8                              | 1:50     |
| PAb421                            | 1:100    |

Supplementary Table 5. Dilutions of the antibodies used for immunofluorescent analysis



| exon    | name         | sequence                     |
|---------|--------------|------------------------------|
| E3      | TAp63(e3)f   | TTAGCATGGACTGTATCCGC         |
| E3'     | DelNp63F     | GCCCAGACTCAATTTAGTGAG        |
|         |              |                              |
| E14     | RT2p63       | GCTCAGGGATTTTCAGACTTGCCAGATC |
| E10'    | p63grt1      | GCTCCACAAGCTCATTCCTG         |
| E10b    | p63epsr3     | CACTCATGCCTCCTAAAATGACA      |
|         |              |                              |
| E13-E14 | p63alpharev  | ACTTGCCAGATCATCCATGG         |
| E12-14  | p63betaR     | GCCAGATCCTGACAATGCTG         |
| E11-E14 | p63delta rev | ACTTGCCAGATCTGTTGG           |
| E10'    | p63gamma rev | CTCATTCCTGAAGCAGGCTG         |
| E10b    | RTp63eps2    | GCCTCCTAAAATGACACGTTGATAC    |

Supplementary Table 6. List of the oligos used for p63 isoforms detection by nested PCR

|                          | 1 <sup>st</sup> PCR |           | 2 <sup>nd</sup> PCR |                  |
|--------------------------|---------------------|-----------|---------------------|------------------|
| TAp63 $\alpha$           | TAp63 e3f           | RT2p63    | TAp63 e3f           | p63 $\alpha$ rev |
| TAp63 $\beta$            |                     |           |                     | p63 $\beta$ rev  |
| TAp63 $\delta$           |                     |           |                     | p63 $\delta$ rev |
| TAp63 $\gamma$           |                     | p63 grt1  |                     | p63 $\gamma$ rev |
| TAp63 $\epsilon$         |                     | p63 epsr3 |                     | RTp63 eps2       |
| $\Delta$ Np63 $\alpha$   | $\Delta$ Np63 f     | RT2p63    | $\Delta$ Np63 f     | p63 $\alpha$ rev |
| $\Delta$ Np63 $\beta$    |                     |           |                     | p63 $\beta$ rev  |
| $\Delta$ Np63 $\delta$   |                     |           |                     | p63 $\delta$ rev |
| $\Delta$ Np63 $\gamma$   |                     | p63 g rt1 |                     | p63 $\gamma$ rev |
| $\Delta$ Np63 $\epsilon$ |                     | p63 epsr3 |                     | RTp63 eps2       |

Supplementary Table 7. List of the oligos used for 1st and 2nd PCR reaction for p63 isoforms detection

| <b>Tumour type</b>                 | <b>Tumour details</b>                     | <b>No of patients</b> | <b>Sex</b>                               | <b>Age</b> | <b>Treatment</b>                                                |
|------------------------------------|-------------------------------------------|-----------------------|------------------------------------------|------------|-----------------------------------------------------------------|
| Breast metastases to the brain     | -Triple negative                          | 5                     | Female                                   | 40-76      | -Paclitaxel, vinorelbine, and radiotherapy (3 patients)         |
|                                    | -Her2 positive                            | 5                     |                                          |            | -Paclitaxel and Letrozole (2 patients)                          |
| Primary breast tumour              | -Triple negative                          | 5                     | Female                                   | 41-80      | -Docetaxel, vinorelbine and Herceptin radiotherapy (4 patients) |
|                                    | -Her2 positive                            | 5                     |                                          |            | -Herceptin (1 patient)                                          |
|                                    | -ER and PR positive, and Her2 negative    | 5                     |                                          |            | -Paclitaxel, vinorelbine, and radiotherapy (3 patients)         |
| Lung metastases to the brain       | Metastatic adenocarcinoma                 | 5                     | Male (2 patients)<br>Female (3 patients) | 39-71      | -Paclitaxel and vinorelbine (1 patient)                         |
|                                    |                                           |                       |                                          |            | -Vinorelbine, and radiotherapy ((1 patient)                     |
|                                    |                                           |                       |                                          |            | -Docetaxel, herceptin, and radiotherapy (3 patients)            |
| Lung primary                       | Adenocarcinoma                            | 3                     | Male (2 patients)<br>Female (1 patient)  | 50-61      | -Docetaxel and Herceptin (1 patient)                            |
|                                    |                                           |                       |                                          |            | -Docetaxel, vinorelbine, and Herceptin (1 patient)              |
| Colorectal metastases to the brain | Metastatic adenocarcinoma<br>Bowel origin | 3                     | Male (2 patients)<br>Female (1 patient)  | 54-58      | -Tamoxifen and radiotherapy (3 patients)                        |
|                                    |                                           |                       |                                          |            | Tamoxifen, letrozole, and radiotherapy (1 patient)              |
| Lung metastases to the brain       | Metastatic adenocarcinoma                 | 5                     | Male (2 patients)<br>Female (3 patients) | 39-71      | Tamoxifen and letrozole (1 patient)                             |
|                                    |                                           |                       |                                          |            | -Radiotherapy (3 patients)                                      |
| Lung primary                       | Adenocarcinoma                            | 3                     | Male (2 patients)<br>Female (1 patient)  | 50-61      | -Gefitinib, radiotherapy (1 patient)                            |
|                                    |                                           |                       |                                          |            | Radiotherapy, Cisplatin, and vinblastine (1 patient)            |
| Colorectal metastases to the brain | Metastatic adenocarcinoma<br>Bowel origin | 3                     | Male (2 patients)<br>Female (1 patient)  | 54-58      | -Radiotherapy, cisplatin, and vinblastine (2 patients)          |
|                                    |                                           |                       |                                          |            | -Radiotherapy and gefitinib (1 patient)                         |
| Colorectal metastases to the brain | Metastatic adenocarcinoma<br>Bowel origin | 3                     | Male (2 patients)<br>Female (1 patient)  | 54-58      | -FOLFOX, FOLFIRI with cetuximab (2 patients)                    |
|                                    |                                           |                       |                                          |            | - FOLFOX, FOLFIRI with radiotherapy (1 patient)                 |

Supplementary Table 8: Clinical characteristics of the analysed patients.

### Supplementary references:

- 1 Yewdell, J. W., Gannon, J. V. & Lane, D. P. Monoclonal antibody analysis of p53 expression in normal and transformed cells. *Journal of virology* **59**, 444-452, doi:10.1128/jvi.59.2.444-452.1986 (1986).
- 2 Vojtesek, B. *et al.* Conformational changes in p53 analysed using new antibodies to the core DNA binding domain of the protein. *Oncogene* **10**, 389-393 (1995).
- 3 Midgley, C. A. *et al.* Analysis of p53 expression in human tumours: an antibody raised against human p53 expressed in *Escherichia coli*. *Journal of cell science* **101 ( Pt 1)**, 183-189 (1992).
